# Supplementary material for: Age and growth of Palaeoloxodon huaihoensis from Penghu Channel, Taiwan: significance of their age distribution based on fossils
Source: PeerJ. 2021 Apr 14;9:e11236. doi: 10.7717/peerj.11236 (PMC8052959; doi:10.7717/peerj.11236)
Supplement: Supplemental Information 1 [file peerj-09-11236-s001.xlsx]

## Sheet: 工作表1
Dental measurements of the Late Pleistocene Palaeoloxodon huaihoensis from Penghu Channel
Position	Catalog number	Plate count	Plate count (worn out)	Length (mm)	Width (mm)	Height (mm)	Enamel thickness (mm)	Lamellar Frequency (buccal)	Lamellar Frequency (occlusal)
left upper M3	F026920	(-)17	(-)17	127	71.5	239	0.97	8	5.6
right upper M3	F026920	(-)17	(-)6	121	72.5	245.5	1.01	7.7	5.8
left upper M3	F026921	13	12	199.5	84	188.5	1.06	7	7.6
right lower M3	F026923	14	14	311	95	222	1.37	4	4.9
left upper M3	F026924	(-)13	(-)12	192.5	80.5	161	2.77	8	10.1
right upper M3	F026924	(-)13	(-)12	159.5	68.5	132.5	2.54	12.1	10.7
left upper M3	F026925	19	12	225	79.5	309	1.03	8.7	7
right upper M3	F026926	11	11	225.5	74	192	3.1	5.2	5.7
left lower M2	F026927	15	15	208	52	173	2.14	8	10
left upper M3	F026928	15	15	229	65.5	213.5	2.26	8.2	7.7
right upper M3	F026928	15	15	230	65	159.5	2.33	7.5	8.1
right upper M2	F026929	(-)10	(-)10	102	46.5	153.5	1.95	14.3	12.5
left upper M2	F026929	(-)11	(-)10	104	47	163	1.82	10.5	11.8
right lower M3	F026930	15	11	262.5	71	181.5	2.45	6.7	7.3
right upper M3	F026932	11	10	161	62.5	137	2.17	10.4	9.5
right upper M3	F026934	15	10	187.5	71	239	2.61	9.3	7
right upper M3	F026935	14	14	239.5	80.5	138	2.19	6.6	6.7
right upper M3	F026939	14	12	188	72	205	2.23	8.6	7.7
left upper M2	F026941	(-)12	(-)12	178	55	186.5	2.06	9	10
right upper M2	F026941	(-)12	(-)12	177	59	181	2.12	9.2	10
right lower M3	F026942	17	11	201	63.5	184	2.69	5.4	7.8
right lower M3	F026943	12	12	213	62	133	2.85	6.3	6.6
right lower M3	F026944	16	13	234	83	203	2.77	4.4	5.3
right upper M3	F026945	20	16	279	92.5	261.5	3.02	9.2	9
right lower M3	F026946	13	11	229	71.5	166	2.98	5.1	5.7
right upper M3	F026947	10	10	139	71	153.5	2.13	7	9.4
left upper M3	F026947	10	10	125.5	68	181.5	2.08	7.5	9.6
left lower M3	F027062	(-)11	(-)7	154.5	54	152	1.91	6.1	12.2
right lower M2	F027302	14	10	164	53	156.5	1.92	9.4	12.1
left upper M3	F027303	17	11	162.5	63	181	2.14	8.2	8.1
right lower M3	F027320	18	14	254.5	75	154.5	2.59	7.3	7
left upper M3	F02770	(-)15	(-)12	202	97	170	3.1	9.9	13.6
right upper M1	F027924	11	11	125	48	107	2.21	11.3	10.1
right upper M3	F027931	8	7	107.5	59.5	200.5	2.21	10.5	8
right upper dp4	F027932	11	7	119.5	45.5	113.5	1.69	11.4	14.3
left lower dp4	F027933	9	9	103.5	38	125.5	1.61	9.3	11.1
left upper M3	F027934	21	13	190	76.5	223.5	2.6	12.1	8.4
right upper M3	F027935	14	12	194.5	60	149.5	2.17	8	9.3
left upper M3	F027938	13	13	162	73.5	130	2.49	11.6	12.5
right upper M1	F027941	9	9	102	57.5	142	2.74	6.8	11.3
left upper M1	F027941	9	9	107	59	169	2.69	6.8	9.9
right upper M3	F027943	(-)8	(-)8	108	57.5	187	2.47	10	9
right upper M3	F027945	16	15	183	71	118.5	2.54	9.9	13.6
left upper M3	F027946	(-)13	(-)12	193	107	175	2.69	6.9	7.9
left upper M3	F027948	(-)11	(-)10	165.5	66.5	161	2.56	6	6.7
right lower M3	F027949	9	8	105	68.5	109.5	2.25	8.4	9.5
left lower M2	F027950	10	10	164.5	70	197.5	2.64	6.5	7.1
left upper M3	F027951	13	12	184	67.5	185	2.35	10.3	11.1
left upper M3	F027953	13	12	212.5	76.5	207.5	2.64	8.6	7.6
left upper M3	F027955	11	7	97.5	63	235	2.47	9	6.7
left upper M3	F027956	14	11	175	68.5	184.5	2.17	9.6	10.1
right upper M3	F027957	13	12	187.5	73.5	218.5	2.49	10	9.3
left lower M3	F027958	13	12	186	54	187.5	2	6.9	8.3
left upper M3	F027960	14	12	209.5	82	169	2.53	10	9.4
right upper M3	F027961	-8	-7	100.5	85.5	96	2.52	6.8	9.9
left upper M3	F027962	14	11	201	82.5	222	2.89	7	7.5
right lower M3	F027963	11	11	253	69.5	156	3.19	4.8	5.2
left lower M1	F027964	11	9	141	34	140	1.32	11.6	13.6
left upper M3	F027966	7	7	101.5	62.5	140.5	2.52	6.3	7.5
right lower M3	F027967	9	9	181.5	79	182	3	6.7	5.3
right upper M3	F027968	(-)8	(-)7	128	54.5	152	2.41	6.9	7.4
left upper M3	F027978	10	10	213	70.5	182.5	2.84	7.5	7
right upper M1	F027979	(-)11	(-)8	115	33	104	1.82	10	13.6
left upper M3	F027982	13	12	228.5	71	187.5	2.65	6.5	6.6
left upper M1	F027983	(-)11	(-)10	129	50	161	1.71	11.8	13.1
left upper M3	F027984	13	15	177.5	80	168	3.38	4	5.8
left lower M3	F027985	14	14	238.5	65.5	181	2.56	6.9	8.1
right lower M2	F027988	17	12	161	45	135.5	1.85	8.6	13.3
left lower M3	F020217	16	12	247	80.5	161.5	2.95	4.3	7.1
left upper M3	F020216	(-)19	(-)12	240	89	267	5.01	6.3	6.8
right upper M3	F020218	(-)20	(-)13	227	75	247	3.09	8.9	7
left upper M3	F020219	(-)15	(-)13	219	83	246	3.87	6.9	6
left lower M2	F020220	(-)8	-6	101	66	165	3.12	9.3	7.4
left lower M3	F020221	(-)13	(-)12	202	67	144	2.88	7.7	6.3
left lower M2	F020222	(-)14	(-)11	227	65	140	3.58	4.8	6.9
left upper M3	F020223	22	11	238	84	255.5	3.94	6.1	6.6
left upper M3	F020224	(-)15	(-)13	211	77	208	3.13	6.7	5.5
right lower M3	F020226	(-)13	(-)11	185	54	167	2.13	7.1	9.1
right upper M3	F020227	11	10	190	80	202	3.2	5.7	8.9
left upper M3	F020228	17	8	134	67.5	188.5	2.43	7.3	7
left upper M2	F020229	(-)9	(-)9	102	61.5	141	2.21	7.5	9.3
left upper M2	F020231	9	9	104	56	120	2.06	12.5	11.8
left upper M3	F020231	(-)7	3	42	50	119.5	2.19	12.6	16.2
left upper M3	F020232	(-)12	(-)7	94	72	253	2.59	10.1	16
left upper M3	F020233	(-)13	(-)4	61	70	257.5	2.29	8.9	11.4
left upper M2	F020234	(-)9	(-)9	113	43	128	1.91	9.8	10.8
left upper M3	F020235	(-)16	(-)14	210	84	187	2.51	10	10.5
left lower M3	F020236	(-)10	(-)9	164	74	145	2.8	5.2	6.6
left upper M3	F020237	(-)8	(-)4	67.5	61	243	2.55	8.6	9
left upper M3	F020238	(-)6	(-)6	98.5	63	132	1.93	8	6.7
left upper M2	F020239	(-)9	(-)6	114	32	85	1.57	8.5	16.7
right upper M3	F020240	(-)10	(-)10	143	72	163	2.08	7.1	8.3
left upper M2	F020241	(-)5	(-)4	82	63	135	2.13	6.7	11.9
right upper M3	F020242	(-)4	(-)4	68	72	164	1.93	5.7	7
right upper M3	F020243	(-)11	(-)10	230	87	248.5	2.95	5.8	6.3
left upper M3	F020244	10	10	151.5	52	145	2.4	7.5	9
left upper M2	F020246	(-)12	(-)8	93	39.5	110.5	1.88	12.9	13.6
right lower M2	F020247	-13	(-)11	150	37	120	1.72	12.1	11.9
right lower M3	F020248	(-)10	(-)10	172.5	80	258	2.47	5.9	7.3
left upper M3	F020251	(-)11	(-)10	156.5	96.5	172.5	2.95	10	10.5
left upper M3	F020252	13	13	216	77	243.5	2.96	7.4	7.8
right upper M2	F020254	14	13	196.5	49.5	141.5	2.39	13.8	13.8
right lower M2	F020255	(-)15	(-)12	177	35	118	2.25	12.1	23.5
right lower M3	F020256	8	8	104	48	125	2.93	9.1	13.3
left upper M3	F020257	(-)5	(-)4	75.5	51.5	159.5	3.28	6.1	7
left lower M3	F020258	17	13	244.5	62	150.5	2.76	5.9	6.2
left lower M3	F020259	(-)9	(-)8	103	70	148	2.16	6.2	17.4
left upper M3	F020260	(-)10	(-)8	102	50	91.5	2.86	9.2	11
right lower M3	F020261	10	10	151.5	60	167.5	2.21	7.7	7.5
left upper M3	F020262	18	10	180	87	210.5	2.92	10	7.3
right lower M3	F020263	13	12	193.5	57	146	2.71	7.8	10
right lower M2	F020265	13	7	170	53	144	2.2	7.5	12.3
left upper M3	F020267	(-)12	(-)12	197	83.5	206.5	3.43	7.1	7.4
left upper M3	F020268	14	13	172	67	140	2.4	7.9	8.9
left upper M3	F020269	11	11	214	61	144.5	3.08	7.4	5.9
left upper M3	F020270	13	8	94	46	116	2.35	11.8	11.1
right upper M3	F020271	13	12	180.5	67.5	210.5	2.43	12.9	16.7
left upper M3	F020272	(-)12	(-)10	194	68	222	3.05	9.6	6.8
left upper M1	F020273	10	4	54	33	65.5	1,95	11.1	15.4
right lower M3	F020275	(-)5	(-)5	90	60.5	177.5	2.32	7.7	10.5
right lower M3	F020276	(-)5	(-)5	84	61	108	2.66	7.3	7.1
left lower M3	F020277	(-)11	(-)9	183	72	146	2.91	6.1	6.3
left lower M3	F020278	12	11	182	51	188.5	2.22	8.4	8.8
left upper M3	F020279	8	5	89	57	197	2.78	9.8	7.1
left upper M3	F020281	15	11	237	89	218.5	3.19	8.6	5.5
right lower M3	F020282	16	14	213	66.5	150.5	2.35	6.5	9.2
left upper M2	F020283	5	4	62	51.5	140	1.86	7.3	10.1
right lower M1	F020284	10	10	132.5	52	156	2.16	9.6	10.5
right lower M3	F020286	14	12	251.5	100.5	143	3.1	5.9	6.1
left lower M3	F020287	11	11	195.5	70	199.5	2.3	7.1	7
left lower M3	F020289	7	7	143	64.5	170	2.64	6.6	5.9
right upper M3	F020290	7	7	128.5	70	151.5	3.05	6.3	6.5
right upper M3	F020292	17	10	191.5	63	155.5	2.65	6.6	7.6
right lower M3	F020295	18	14	254.5	53	163	2.17	6.7	8.7
right lower M2	F020296	4	4	66	50	123.5	3.15	6.3	7.3
left upper M3	F020298	16	9	213	86	279	3.55	7.9	5.5
left upper M2	F020300	12	6	75	47.5	191	2.17	11.1	10.5
left lower M3	F020301	(-)15	(-)14	230	47.5	189.5	2.3	7.3	7.5
left upper M3	F020302	15	10	219	82	214.5	3.16	5.7	5.5
left lower M3	F030109	(-)4	(-)4	53	60	168	2.45	7.2	8.6
left upper M2	F030110	9	9	147	56.5	98.5	2.54	8.3	8.8
right upper M2	F030110	8	8	128.5	56.5	134	2.56	7.8	9.5
right lower M2	F030111	13	12	199.5	53.5	171	2.52	6.2	7.6
left upper M3	F030696	15	12	222	69.5	222.5	2.38	7.2	7.3
right upper M3	F030696	15	13	212	71.5	235	2.26	8.2	8.3
right upper M3	F030698	22	13	258	91.5	333	3.2	7.1	5.5
right lower M3	F030699	(-)14	(-)14	222	65	208	2.47	5.4	8
left upper M1	F034531	11	11	158	50	164	2.06	10	11.4
right upper M1	F034531	11	11	151	53.5	197.5	2.39	10	10.5
right upper M3	F035327	16	8	164.9	83.5	215.5	2.68	7.1	6.8
left upper M3	F035327	14	8	150.5	87	233	2.68	7.8	6.5
left upper M3	F035338	10	9	184.5	70.5	117	2.5	5.6	6.4
right upper M2	F035750	11	11	161	62.5	149.5	2.06	9.4	10.4
left upper M2	F035750	11	11	161.5	64.5	158.5	2.1	9.1	10.1
left upper M2	F035755	15	8	95	55.5	141.5	1.84	14.6	11.6
left lower M3	F035756	(-)13	(-)10	183	55	165	2.27	6.5	7.8
right upper M2	F044043	14	12	172	56	214.5	2.19	9.3	10.5
left upper M2	F044043	14	12	163	57.5	188.5	2.05	9	9.9
right upper M3	F044248	15	13	259.5	91	154.5	2.91	5.9	6.9
left upper M3	F044248	15	13	258.5	94	167.5	3.3	5.7	6.6
left upper M2	F044250	10	10	143.5	63	177	2.19	7.9	9.6
right upper M2	F044250	10	10	142.5	61.5	190.5	2.07	7.8	10.1
left upper M3	F044251	20	13	253	90	263	3.2	7.3	6.4
left upper M3	F044252	17	10	181.5	73	271	2.66	7.5	6.5
right upper M3	F044253	21	9	225	72.5	224	2.65	7.4	6.4
left lower M3	F044254	14	14	260	78.5	157	2.76	5.7	5.6
left lower M3	F044255	14	14	222.5	81	205.5	2.42	5.1	6.2
left lower M3	F044256	10	10	176	73.5	145	2.39	6.2	7
right lower M2	F044257	8	8	102.5	54	97.5	2.57	7.8	7.8
right lower M3	F044257	18	9	188	61	170.5	2.18	6.8	7.5
right lower M2	F044258	17	11	230	51.5	163	2.23	7.1	8.7
right lower M3	F044259	16	14	234	76	186.5	2.89	5.8	5.9
left lower M3	F044260	12	11	204	59	217.5	2.7	5.4	6.1
right lower M3	F044261	11	11	232	66.5	146	3.14	5	6.7
left upper M3	F044263	16	14	236.5	93	210	2.99	8.2	7.1
left lower M1	F044264	10	10	130	52	170.5	2.26	8.4	9.2
right lower M3	F044265	13	13	280	75	167.5	2.94	5.6	5.3
right lower M3	F044266	19	16	258	83	168.5	2.66	5.6	7
right lower M3	F044268	13	12	205.5	83.5	171	3.37	6	7
left lower M3	F044270	15	13	219	61.5	161	3.11	6.1	7.4
right lower M2	F044271	11	11	124	46.5	143.5	2.02	7.2	10.1
left lower M3	F044272	12	12	177.5	62	150	2.4	7.5	6.7
left upper M3	F044273	(-)19	(-)14	203	83.5	265	2.92	7.3	6.8
left lower M3	F044274	11	8	167.5	84.5	193.5	2.52	4.8	5.3
left lower M3	F044276	(-)11	-8	141	74.5	149.5	3.06	6.4	6.7
left lower M3	F044277	(-)11	(-)11	186.5	72.5	125.5	2.56	6	6.1
left lower M3	F044278	(-)11	(-)11	206	68	177.5	2.79	5.8	7.3
left lower M3	F044279	11	11	200	61.5	130	2.92	5.5	6.3
right lower M3	F051487	22	13	350	79	208.5	2.47	4.6	6.5
right lower M1	F051497	8	8	114	54	174	0.71	7	8.1
left upper M2	F051499	16	10	191.5	55.5	192	0.4	9.2	9.4
right upper M2	F051499	16	11	153	55.5	182	0.46	8.1	8.9
right lower M3	F051500	(-)13	(-)10	218.5	85	191.5	2.8	5	5.2
right lower M2	F051503	14	14	176	61.5	157	0.41	7.4	9.9
left lower M3	F051555	(-)6	(-)6	129.5	63.5	151.5	1.58	6.6	5.3
left lower M3	F051557	14	12	290	92.5	149.5	3.54	5.2	5.5
right lower M3	F051559	7	7	146.5	54	117.5	3.01	4.8	6.9
left lower M3	F051560	14	13	234.5	67.5	219.5	2.99	6.1	7.7
left lower M1	F051562	7	7	70	34	162.5	2.2	11.3	11.6
left lower M2	F051562	14	9	158	36	145	2.28	7.8	10.7
left lower M3	F051590	17	14	257.5	58.5	142	2.91	7	6.6
left lower M3	F051610	(-)10	(-)10	187	73	75.5	2.6	6.7	7.1
left lower dp4	F051613	8	8	70	28.5	97.5	1.47	15.1	12.9
right lower M3	F051615	16	11	258.5	67	164	2.09	7	8.2
right lower M3	F051617	16	12	235.5	85	217.5	2.93	7.5	7.6
right lower M3	F051619	16	11	236	73.5	221.5	2.56	6.9	7.6
left upper M3	F051622	(-)20	(-)9	204.5	80	232	2.93	8.9	7
left lower M3	F051623	14	9	200	65.5	156	2.06	6.8	8.3
left upper M2	F051624	8	8	142.5	78.5	234	2.84	8.6	5.4
left upper M3	F051624	11	6	104	74.5	242.5	2.7	7	6
left upper M3	F051625	17	12	266	99	281	3.45	6	5.3
right upper M3	F051626	10	7	169	88	249.5	2.81	6	5.4
left upper M3	F051627	9	9	199	86.5	193.5	3.71	8.6	5.4
right upper M3	F051628	18	16	252.5	85	221.5	2.49	8.3	7.6
right upper M3	F051629	18	13	212.5	82	240.5	2.46	10	8.6
left upper M3	F051647	20	15	296.5	109.5	225.5	2.78	5.3	6.4
left upper M3	F051652	16	(-)13	202.5	99	165	2.64	6.3	10.1
left upper M3	F051653	13	7	126	57.5	226.5	1.93	8.4	7.5
left upper M3	F051657	(-)10	(-)10	202	82	178.5	2.48	5.3	6.3
left upper M2	F051658	(-)10	(-)10	171.5	73.5	183.5	2.53	5.9	7.8
left upper M3	F051659	9	9	146	70.5	121	3.02	6.8	7.8
